# Supplementary material for: Pituitary-Gland-Based Genes Participates in Intrauterine Growth Restriction in Piglets
Source: MDPI journal article supplement (doi:10.3390/genes13112141), 2022-11-17
Supplement: s1 [file s1]

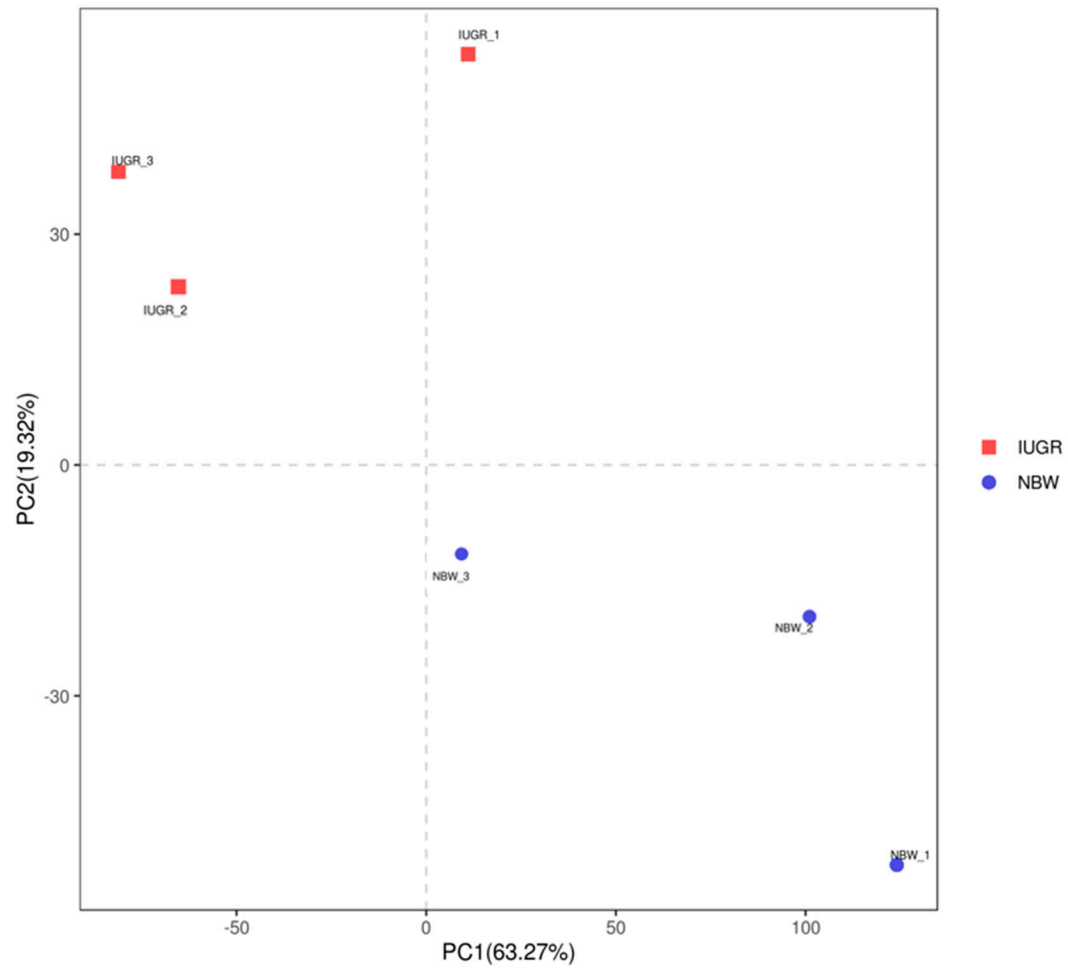

**Figure S1.** Differences between transcriptome replicates of IUGR and NBW group piglets based on principal component analysis.

Note: the abscissa is the first principal component and the ordinate is the second principal component.
