# Supplementary material for: Pituitary-Gland-Based Genes Participates in Intrauterine Growth Restriction in Piglets
Source: MDPI journal article supplement (doi:10.3390/genes13112141), 2022-11-17
Supplement: s1 [file s1]

**Supplementary Table S3:Information on differential expressed genes**

| Gene ID            | Log2 fold change | P-value  | Chromosome | Gene name |
|--------------------|------------------|----------|------------|-----------|
| ENSSSCG00000031616 | 2.98             | 1.22E-09 | 6          | FOSB      |
| Novel00842         | -2.34            | 1.35E-06 | 6          | -         |
| Novel00209         | 2.14             | 0.00020  | 12         | -         |
| ENSSSCG00000037572 | 3.40             | 0.00023  | 11         | EPSTI1    |
| ENSSSCG00000007398 | -2.42            | 0.00039  | 17         |           |
| ENSSSCG00000011973 | 1.94             | 0.00043  | 13         | COL8A1    |
| ENSSSCG00000043543 | -                | 0.00051  | 6          |           |
| ENSSSCG00000014833 | -1.54            | 0.00058  | 9          | UCP2      |
| ENSSSCG00000004464 | 1.61             | 0.00059  | 16         | ITGA1     |
| ENSSSCG00000045866 | 2.47             | 0.00060  | 6          |           |
| Novel00971         | 1.96             | 0.00060  | 8          | -         |
| ENSSSCG00000031307 | 3.03             | 0.00060  | 12         |           |
| ENSSSCG00000014799 | -1.85            | 0.00076  | 9          |           |
| ENSSSCG00000005498 | 1.94             | 0.00076  | 1          | PAPPA     |
| ENSSSCG00000010727 | 1.51             | 0.00094  | 14         | GPR26     |
| ENSSSCG00000002383 | 1.45             | 0.00105  | 7          | FOS       |
| ENSSSCG00000024514 | 2.89             | 0.00127  | 16         | SHISAL2B  |
| ENSSSCG00000003259 | 3.24             | 0.00134  | 6          | OSCAR     |
| ENSSSCG00000050205 | 1.80             | 0.00136  | 14         |           |
| ENSSSCG00000021998 | 1.97             | 0.00137  | 5          |           |
| ENSSSCG00000029311 | 2.23             | 0.00141  | 14         | MYPN      |
| Novel00716         | 2.12             | 0.00157  | 4          | -         |
| ENSSSCG00000017749 | 1.97             | 0.00171  | 12         |           |
| ENSSSCG00000015268 | 2.25             | 0.00181  | 9          | FMO1      |
| ENSSSCG00000036201 | 2.40             | 0.00186  | 16         | NPR3      |
| ENSSSCG00000021122 | 7.26             | 0.00222  | 5          | TPH2      |
| ENSSSCG00000050684 | 2.71             | 0.00224  | 1          |           |
| ENSSSCG00000042873 | 2.90             | 0.00228  | 14         |           |
| ENSSSCG00000045796 | -3.00            | 0.00228  | 9          |           |
| ENSSSCG00000005267 | 1.39             | 0.00236  | 1          | ANXA1     |
| ENSSSCG00000011911 | 1.87             | 0.00251  | 13         | DRD3      |
| ENSSSCG00000007805 | -3.32            | 0.00319  | 3          | ATP2A1    |
| ENSSSCG00000026233 | 1.43             | 0.00359  | 2          |           |
| ENSSSCG00000045759 | 2.29             | 0.00371  | 8          |           |
| ENSSSCG00000026978 | -                | 0.00392  | 1          | ROS1      |
| ENSSSCG00000011046 | 1.62             | 0.00402  | 10         | ITGA8     |
| ENSSSCG00000011905 | -3.51            | 0.00494  | 13         |           |
| ENSSSCG00000013088 | 2.55             | 0.00503  | 2          | LRRC10B   |
| ENSSSCG00000001793 | 2.26             | 0.00510  | 7          | ADAMTSL3  |
| ENSSSCG00000016848 | 1.62             | 0.00533  | 16         | EGFLAM    |
| ENSSSCG00000009004 | 1.22             | 0.00540  | 8          | SFRP2     |

|                    |       |         |    |         |
|--------------------|-------|---------|----|---------|
| ENSSSCG00000004822 | 1.59  | 0.00560 | 1  | ALDH1A3 |
| ENSSSCG00000043028 | 3.72  | 0.00565 | 2  |         |
| Novel00915         | -1.95 | 0.00566 | 7  | -       |
| ENSSSCG00000036814 | -1.50 | 0.00576 | 6  | CLEC11A |
| ENSSSCG00000046072 | 1.58  | 0.00587 | 5  |         |
| Novel00098         | -     | 0.00600 | 10 | -       |
| ENSSSCG00000034948 | 1.26  | 0.00602 | 5  | RASSF9  |
| ENSSSCG00000048240 | 1.59  | 0.00633 | 1  | SAMD5   |
| ENSSSCG00000035715 | 1.68  | 0.00636 | 1  | GCH1    |
| ENSSSCG00000016613 | 1.28  | 0.00649 | 18 | AASS    |
| ENSSSCG00000001036 | -1.95 | 0.00654 | 7  | TFAP2A  |
| ENSSSCG00000039196 | -1.24 | 0.00661 | 6  | POLR2I  |
| ENSSSCG00000003346 | 1.75  | 0.00662 | 6  |         |
| Novel00709         | 3.55  | 0.00667 | 4  | -       |
| Novel00210         | 1.24  | 0.00713 | 12 | -       |
| ENSSSCG00000012489 | 1.46  | 0.00715 | X  | TRMT2B  |
| ENSSSCG00000013463 | -1.28 | 0.00733 | 2  | LSM7    |
| ENSSSCG00000016898 | 1.66  | 0.00734 | 16 |         |
| ENSSSCG00000041354 | 1.90  | 0.00737 | 1  |         |
| Novel00302         | -1.76 | 0.00746 | 14 | -       |
| Novel00110         | 1.29  | 0.00760 | 10 | -       |
| Novel00047         | 1.28  | 0.00761 | 1  | -       |
| Novel00866         | 1.64  | 0.00771 | 6  | -       |
| ENSSSCG00000006001 | 1.28  | 0.00773 | 4  | ENPP2   |
| ENSSSCG00000048712 | 4.05  | 0.00786 | 15 |         |
| ENSSSCG00000012572 | 1.31  | 0.00792 | X  | COL4A5  |
| ENSSSCG00000012571 | 1.28  | 0.00809 | X  | COL4A6  |
| ENSSSCG00000004762 | -1.47 | 0.00809 | 1  | DNAJC17 |
| ENSSSCG00000022236 | 1.19  | 0.00821 | 9  |         |
| ENSSSCG00000021873 | -1.17 | 0.00848 | 7  | CRABP1  |
| ENSSSCG00000025535 | -2.19 | 0.00870 | 7  | TFAP2B  |
| ENSSSCG00000008073 | 1.62  | 0.00908 | 3  | OMD     |
| Novel00618         | -6.58 | 0.00956 | 3  | -       |
| ENSSSCG00000011721 | 1.20  | 0.01018 | 13 | P2RY1   |
| ENSSSCG00000008830 | 2.00  | 0.01034 | 8  | CWH43   |
| ENSSSCG00000022230 | 1.13  | 0.01042 | 5  | CD9     |
| ENSSSCG00000051042 | -     | 0.01054 | 3  |         |
| ENSSSCG00000050121 | 1.42  | 0.01065 | 14 |         |
| ENSSSCG00000001739 | 2.28  | 0.01101 | 7  | CRISP1  |
| ENSSSCG00000022679 | 1.36  | 0.01128 | 7  | COCH    |
| ENSSSCG00000026748 | -1.21 | 0.01129 | 3  | PLK1    |
| ENSSSCG00000014232 | 1.34  | 0.01150 | 2  | LOX     |
| Novel00986         | 2.09  | 0.01165 | 8  | -       |
| ENSSSCG00000009220 | 1.11  | 0.01182 | 8  | DMP1    |

|                    |       |         |    |          |
|--------------------|-------|---------|----|----------|
| ENSSSCG00000021130 | -1.26 | 0.01196 | 7  | RPP21    |
| ENSSSCG00000041987 | 1.61  | 0.01198 | 6  |          |
| ENSSSCG00000023374 | 1.35  | 0.01199 | 14 | SRGN     |
| ENSSSCG00000031321 | 1.13  | 0.01202 | 5  | NR4A1    |
| ENSSSCG00000038110 | 2.29  | 0.01204 | 2  | TIFAB    |
| ENSSSCG00000013832 | -2.19 | 0.01239 | 2  |          |
| ENSSSCG00000009152 | 1.37  | 0.01242 | 8  | SGMS2    |
| ENSSSCG00000038575 | -1.30 | 0.01253 | 2  |          |
| ENSSSCG00000023915 | 2.25  | 0.01258 | 12 | SLC2A4   |
| ENSSSCG00000026211 | -1.10 | 0.01271 | 7  | NRN1     |
| ENSSSCG00000043918 | 2.55  | 0.01305 | 6  |          |
| Novel00607         | 3.91  | 0.01314 | 3  | -        |
| ENSSSCG00000050545 | -3.82 | 0.01341 | 14 |          |
| ENSSSCG00000003368 | 2.58  | 0.01348 | 6  | RNF207   |
| ENSSSCG00000051055 | 2.45  | 0.01364 | 14 |          |
| ENSSSCG00000006171 | 1.24  | 0.01370 | 4  | CRISPLD1 |
| ENSSSCG00000005379 | 1.49  | 0.01377 | 1  | GALNT12  |
| ENSSSCG00000031579 | 1.09  | 0.01433 | 4  | PCP4L1   |
| ENSSSCG00000035524 | 1.12  | 0.01440 | 12 | WNT9B    |
| ENSSSCG00000012543 | 3.18  | 0.01474 | X  |          |
| ENSSSCG00000001963 | 1.11  | 0.01495 | 7  | EGLN3    |
| ENSSSCG00000043814 | -1.42 | 0.01522 | 1  |          |
| ENSSSCG00000010826 | 1.14  | 0.01523 | 10 | MTARC2   |
| ENSSSCG00000004885 | 1.15  | 0.01526 | 1  | CDH19    |
| ENSSSCG00000010664 | 1.30  | 0.01542 | 14 | ENO4     |
| ENSSSCG00000001729 | -1.86 | 0.01557 | 7  | PTCHD4   |
| ENSSSCG00000009735 | -1.69 | 0.01561 | 14 | P2RX2    |
| ENSSSCG00000028203 | 3.93  | 0.01564 | 13 |          |
| Novel00246         | 1.90  | 0.01570 | 13 | -        |
| ENSSSCG00000048035 | 4.62  | 0.01575 | 6  |          |
| ENSSSCG00000013100 | 1.23  | 0.01575 | 2  |          |
| ENSSSCG00000022592 | 1.54  | 0.01605 | 2  | FIBIN    |
| ENSSSCG00000021885 | 1.34  | 0.01610 | 18 | MDFIC    |
| Novel01071         | 1.70  | 0.01632 | 9  | -        |
| ENSSSCG00000038188 | 1.26  | 0.01640 | 10 |          |
| ENSSSCG00000011125 | 3.83  | 0.01656 | 10 | GATA3    |
| Novel01001         | 2.26  | 0.01660 | 8  | -        |
| ENSSSCG00000005240 | 1.09  | 0.01672 | 1  | DOCK8    |
| ENSSSCG00000032098 | -1.19 | 0.01675 | 6  |          |
| ENSSSCG00000047105 | -1.90 | 0.01680 | 2  |          |
| ENSSSCG00000006308 | 1.07  | 0.01685 | 4  | CREG1    |
| ENSSSCG00000036932 | 2.23  | 0.01687 | 15 | WNT6     |
| ENSSSCG00000032416 | 1.63  | 0.01694 | 10 | RGS1     |
| ENSSSCG00000047527 | -     | 0.01700 | 2  |          |

|                    |       |         |    |          |
|--------------------|-------|---------|----|----------|
| Novel00794         | -4.71 | 0.01716 | 6  | -        |
| ENSSSCG00000029227 | 1.10  | 0.01727 | 8  | LDB2     |
| Novel00244         | 1.77  | 0.01757 | 13 | -        |
| ENSSSCG00000031027 | 1.77  | 0.01789 | X  | IRS4     |
| ENSSSCG00000016516 | -1.61 | 0.01825 | 18 | ATP6V0A4 |
| ENSSSCG00000033432 | -1.58 | 0.01856 | 7  | CHMP4A   |
| ENSSSCG00000008522 | 1.74  | 0.01865 | 3  | XDH      |
| ENSSSCG00000015272 | -     | 0.01874 | 9  | OPTC     |
| ENSSSCG00000040617 | 1.33  | 0.01874 | 2  | TNFAIP8  |
| ENSSSCG00000043030 | 4.60  | 0.01878 | 6  |          |
| ENSSSCG00000004614 | -1.04 | 0.01890 | 1  | UNC13C   |
| ENSSSCG00000001481 | 1.16  | 0.01915 | 7  | HCRTR2   |
| Novel00779         | -2.66 | 0.01953 | 5  | -        |
| ENSSSCG00000035392 | 1.66  | 0.01970 | 15 | IGFBP2   |
| ENSSSCG00000004789 | 1.10  | 0.01995 | 1  | THBS1    |
| ENSSSCG00000005136 | 3.38  | 0.02006 | 1  | IFNE     |
| Novel00921         | 3.38  | 0.02017 | 7  | -        |
| ENSSSCG00000017520 | 1.44  | 0.02084 | 12 | LRRC46   |
| ENSSSCG00000001027 | 1.11  | 0.02091 | 7  | BMP6     |
| Novel00096         | -3.82 | 0.02104 | 10 | -        |
| ENSSSCG00000034117 | -     | 0.02116 | 10 | U6       |
| ENSSSCG00000051231 | -3.80 | 0.02135 | X  |          |
| ENSSSCG00000016997 | 1.68  | 0.02136 | 16 | FGF18    |
| ENSSSCG00000006857 | 1.03  | 0.02197 | 4  | COL11A1  |
| ENSSSCG00000010691 | -1.05 | 0.02201 | 14 | PLPP4    |
| Novel00748         | 1.32  | 0.02206 | 5  | -        |
| ENSSSCG00000009631 | 3.31  | 0.02211 | 14 | PEBP4    |
| ENSSSCG00000031712 | 3.75  | 0.02216 | 5  | MFAP5    |
| Novel00545         | -3.56 | 0.02216 | 2  | -        |
| ENSSSCG00000040461 | 1.05  | 0.02224 | 2  | CDKN1C   |
| ENSSSCG00000017614 | 1.10  | 0.02229 | 12 | TRIM25   |
| ENSSSCG00000006877 | 1.11  | 0.02236 | 4  | SNX7     |
| ENSSSCG00000017781 | 1.25  | 0.02238 | 12 | PIPOX    |
| ENSSSCG00000034811 | 1.10  | 0.02296 | 8  | QDPR     |
| ENSSSCG00000032587 | -1.13 | 0.02296 | 6  |          |
| ENSSSCG00000001455 | 2.02  | 0.02299 | 7  |          |
| Novel00772         | -1.86 | 0.02303 | 5  | -        |
| ENSSSCG00000028924 | -1.13 | 0.02350 | 12 | AURKB    |
| ENSSSCG00000004632 | 1.44  | 0.02361 | 1  | GLDN     |
| ENSSSCG00000036101 | -2.57 | 0.02373 | 12 |          |
| ENSSSCG00000044764 | 1.17  | 0.02380 | 13 |          |
| ENSSSCG00000012137 | 3.05  | 0.02423 | X  | BMX      |
| ENSSSCG00000008294 | 2.46  | 0.02431 | 3  | ACTG2    |
| Novel00346         | 1.07  | 0.02438 | 15 | -        |

|                    |       |         |    |          |
|--------------------|-------|---------|----|----------|
| ENSSSCG00000017068 | 1.49  | 0.02453 | 16 | FAXDC2   |
| ENSSSCG00000003663 | -1.21 | 0.02500 | 3  | HPCAL1   |
| ENSSSCG00000029296 | 2.04  | 0.02512 | 6  | FOXC2    |
| ENSSSCG00000010451 | 1.29  | 0.02538 | 14 | IFIT2    |
| ENSSSCG00000016885 | 1.03  | 0.02546 | 16 | OXR4     |
| ENSSSCG00000027266 | 1.56  | 0.02572 | 5  | PNPLA3   |
| ENSSSCG00000014117 | 1.81  | 0.02592 | 2  | THBS4    |
| ENSSSCG00000017797 | 4.91  | 0.02607 | 12 | SLC6A4   |
| ENSSSCG00000035887 | 1.35  | 0.02623 | 4  | C8orf34  |
| ENSSSCG00000006206 | 1.21  | 0.02625 | 4  |          |
| Novel00411         | -3.70 | 0.02697 | 16 | -        |
| ENSSSCG00000007470 | 1.20  | 0.02704 | 17 | RIPOR3   |
| ENSSSCG00000008875 | 2.02  | 0.02718 | 8  | RXFP1    |
| ENSSSCG00000049203 | -     | 0.02722 | 1  |          |
| ENSSSCG00000016033 | 1.02  | 0.02737 | 15 | GULP1    |
| ENSSSCG00000028139 | -1.37 | 0.02740 | 3  | CCDC154  |
| ENSSSCG00000025345 | -1.80 | 0.02770 | 12 | GUCY2D   |
| Novel00383         | 1.99  | 0.02774 | 15 | -        |
| ENSSSCG00000041295 | 3.28  | 0.02781 | 14 |          |
| Novel00237         | 3.29  | 0.02816 | 13 | -        |
| ENSSSCG00000045386 | -3.28 | 0.02823 | 8  |          |
| ENSSSCG00000002917 | -1.06 | 0.02833 | 6  | NFKBID   |
| ENSSSCG00000000117 | 1.04  | 0.02838 | 5  | C22orf23 |
| ENSSSCG00000023351 | 1.07  | 0.02855 | 9  | PLA2G4A  |
| ENSSSCG00000028046 | 1.91  | 0.02861 | 10 |          |
| ENSSSCG00000028056 | 1.00  | 0.02937 | 6  | ZFP36    |
| ENSSSCG00000036820 | 1.06  | 0.02943 | 8  |          |
| ENSSSCG00000051283 | -     | 0.02943 | 8  |          |
| ENSSSCG00000013337 | 1.56  | 0.03028 | 2  | BBOX1    |
| ENSSSCG00000002400 | 1.42  | 0.03033 | 7  |          |
| ENSSSCG00000008557 | 1.02  | 0.03045 | 3  | EMILIN1  |
| ENSSSCG00000002829 | 1.14  | 0.03053 | 6  | MMP2     |
| ENSSSCG00000010332 | 2.51  | 0.03064 | 14 | PLAC9    |
| ENSSSCG00000027476 | -1.43 | 0.03068 | 17 |          |
| ENSSSCG00000010303 | 1.07  | 0.03077 | 14 | SYNPO2L  |
| ENSSSCG00000049737 | -1.18 | 0.03109 | 3  |          |
| Novel01031         | -2.48 | 0.03116 | 9  | -        |
| ENSSSCG00000041101 | -3.65 | 0.03117 | 5  |          |
| ENSSSCG00000009002 | 1.16  | 0.03119 | 8  | TLR2     |
| ENSSSCG00000014869 | 1.08  | 0.03131 | 9  | LRRC32   |
| Novel00539         | -2.10 | 0.03137 | 2  | -        |
| ENSSSCG00000036294 | 1.09  | 0.03143 | 6  | NUDT19   |
| ENSSSCG00000038089 | 1.42  | 0.03155 | 13 | COL18A1  |
| ENSSSCG00000040631 | 2.16  | 0.03161 | 14 | LPL      |

|                    |       |         |    |         |
|--------------------|-------|---------|----|---------|
| ENSSSCG00000028996 | 3.31  | 0.03166 | 1  | ALDH1A1 |
| ENSSSCG00000016867 | 2.04  | 0.03169 | 16 | CCDC152 |
| ENSSSCG00000028157 | 1.09  | 0.03193 | 15 | CASP8   |
| ENSSSCG00000039358 | 1.26  | 0.03202 | 13 | SUSD5   |
| ENSSSCG00000003403 | 1.17  | 0.03209 | 6  | CENPS   |
| ENSSSCG00000012593 | 1.83  | 0.03214 | X  | HTR2C   |
| ENSSSCG00000049435 | -3.21 | 0.03238 | 14 |         |
| ENSSSCG00000051441 | 1.11  | 0.03245 | 13 |         |
| ENSSSCG00000033146 | 1.10  | 0.03302 | 5  | CD163   |
| ENSSSCG00000006359 | 1.18  | 0.03309 | 4  | ADAMTS4 |
| ENSSSCG00000051281 | -2.37 | 0.03320 | 7  |         |
| ENSSSCG00000037669 | 1.86  | 0.03327 | 10 | PTPN7   |
| Novel00664         | -1.91 | 0.03356 | 4  | -       |
| ENSSSCG00000017331 | -     | 0.03360 | 12 |         |
| ENSSSCG00000010971 | -1.97 | 0.03380 | 10 | ARID3C  |
| ENSSSCG00000049086 | 1.44  | 0.03383 | 8  |         |
| ENSSSCG00000037478 | -     | 0.03391 | 12 | PRR29   |
| ENSSSCG00000042422 | -3.26 | 0.03403 | 10 |         |
| ENSSSCG00000021651 | -1.57 | 0.03411 | 9  | SCN2B   |
| ENSSSCG00000014274 | 1.23  | 0.03433 | 2  | PDLIM4  |
| ENSSSCG00000047267 | -1.91 | 0.03436 | 5  |         |
| ENSSSCG00000002277 | -1.21 | 0.03454 | 7  | SPTB    |
| ENSSSCG00000033386 | 1.52  | 0.03454 | 4  |         |
| ENSSSCG00000035857 | -2.44 | 0.03457 | 6  |         |
| ENSSSCG00000016200 | 1.89  | 0.03486 | 15 | PRKAG3  |
| ENSSSCG00000048093 | -     | 0.03492 | 4  |         |
| Novel00103         | 3.90  | 0.03501 | 10 | -       |
| ENSSSCG00000026587 | 1.36  | 0.03513 | 9  | BATF3   |
| ENSSSCG00000035293 | 2.69  | 0.03516 | 2  |         |
| ENSSSCG00000049464 | -1.70 | 0.03532 | 2  |         |
| Novel01159         | 1.05  | 0.03542 | X  | -       |
| ENSSSCG00000040885 | -2.71 | 0.03544 | 7  |         |
| ENSSSCG00000017981 | 2.38  | 0.03555 | 12 | ALOXE3  |
| Novel00968         | -1.55 | 0.03559 | 8  | -       |
| ENSSSCG00000002275 | 1.09  | 0.03565 | 7  | PPP1R36 |
| ENSSSCG00000035988 | 5.85  | 0.03568 | 15 | FEV     |
| ENSSSCG00000047414 | -1.76 | 0.03586 | 7  |         |
| ENSSSCG00000016609 | 1.33  | 0.03601 | 18 | SLC13A1 |
| ENSSSCG00000037634 | -     | 0.03614 | 7  | FOXA1   |
| ENSSSCG00000000275 | -1.09 | 0.03619 | 5  | MAP3K12 |
| ENSSSCG00000001419 | -1.36 | 0.03624 | 7  | SLC44A4 |
| ENSSSCG00000022351 | 1.26  | 0.03628 | 14 | GSTO1   |
| ENSSSCG00000049585 | -     | 0.03628 | 9  |         |
| ENSSSCG00000036096 | -2.57 | 0.03645 | 3  |         |

|                    |       |         |    |          |
|--------------------|-------|---------|----|----------|
| ENSSSCG00000016872 | 1.10  | 0.03695 | 16 | HMGCS1   |
| Novel00560         | 2.47  | 0.03725 | 2  | -        |
| ENSSSCG00000039057 | -1.80 | 0.03739 | 3  | ALKAL2   |
| ENSSSCG00000018513 | 1.81  | 0.03752 | 2  |          |
| ENSSSCG00000034503 | 1.20  | 0.03759 | 15 | ERMN     |
| ENSSSCG00000004001 | -1.85 | 0.03768 | 6  |          |
| ENSSSCG00000011766 | 1.28  | 0.03849 | 13 | PEX5L    |
| ENSSSCG00000017037 | -     | 0.03861 | 16 | FABP6    |
| Novel00851         | -1.18 | 0.03862 | 6  | -        |
| ENSSSCG00000034488 | -4.28 | 0.03874 | 14 | NEUROG3  |
| ENSSSCG00000048819 | -     | 0.03880 | 8  |          |
| Novel00810         | -1.22 | 0.03920 | 6  | -        |
| ENSSSCG00000030709 | -2.60 | 0.03964 | 3  |          |
| ENSSSCG00000004012 | 1.06  | 0.03995 | 1  | THBS2    |
| Novel00107         | -1.87 | 0.04013 | 10 | -        |
| ENSSSCG00000005584 | 1.09  | 0.04021 | 1  | CRB2     |
| ENSSSCG00000012295 | -1.04 | 0.04025 | X  | MAGIX    |
| ENSSSCG00000021511 | -4.58 | 0.04043 | 13 | GCSAM    |
| ENSSSCG00000024290 | 1.43  | 0.04068 | 4  | FSBP     |
| ENSSSCG00000012018 | 1.02  | 0.04078 | 13 | CHODL    |
| Novel00275         | -3.12 | 0.04084 | 13 | -        |
| ENSSSCG00000013433 | 1.46  | 0.04113 | 2  | ADAMTSL5 |
| ENSSSCG00000011723 | 1.36  | 0.04128 | 13 | MME      |
| ENSSSCG00000036748 | -1.81 | 0.04157 | 3  |          |
| ENSSSCG00000003078 | 4.20  | 0.04166 | 6  | CEACAM19 |
| ENSSSCG00000014238 | 2.00  | 0.04189 | 2  | PRDM6    |
| Novel00470         | -2.74 | 0.04222 | 18 | -        |
| ENSSSCG00000014766 | 1.25  | 0.04227 | 9  | OR51E1   |
| ENSSSCG00000045479 | 2.41  | 0.04246 | 8  |          |
| ENSSSCG00000031493 | 1.17  | 0.04248 | 6  | CYBA     |
| Novel00414         | -3.05 | 0.04287 | 16 | -        |
| ENSSSCG00000001439 | 2.10  | 0.04302 | 7  | GPSM3    |
| ENSSSCG00000039024 | -1.18 | 0.04333 | 3  | SPSB3    |
| ENSSSCG00000042589 | -1.56 | 0.04369 | 4  |          |
| ENSSSCG00000022248 | -2.83 | 0.04397 | 13 | OTOL1    |
| ENSSSCG00000008796 | 1.62  | 0.04410 | 8  | RBM47    |
| ENSSSCG00000016859 | 2.53  | 0.04419 | 16 | C7       |
| Novel00905         | -1.24 | 0.04421 | 7  | -        |
| ENSSSCG00000015333 | 2.72  | 0.04444 | 9  | ASB4     |
| ENSSSCG00000046950 | 1.53  | 0.04493 | 7  |          |
| ENSSSCG00000040931 | 1.66  | 0.04524 | 17 | SLC17A9  |
| ENSSSCG00000012852 | -1.70 | 0.04573 | 2  | CDHR5    |
| ENSSSCG00000033518 | 1.11  | 0.04602 | 12 | LLGL2    |
| ENSSSCG00000038945 | 1.21  | 0.04606 | 7  |          |

|                    |       |         |    |         |
|--------------------|-------|---------|----|---------|
| ENSSSCG00000041615 | -2.29 | 0.04619 | 6  |         |
| ENSSSCG00000003600 | 1.60  | 0.04619 | 6  | TINAGL1 |
| ENSSSCG00000017548 | -1.28 | 0.04661 | 12 | NGFR    |
| ENSSSCG00000047396 | -2.51 | 0.04669 | 5  |         |
| Novel01000         | 2.03  | 0.04670 | 8  | -       |
| ENSSSCG00000044784 | 1.46  | 0.04676 | 4  |         |
| ENSSSCG00000004133 | 1.15  | 0.04684 | 1  | FUCA2   |
| ENSSSCG00000041917 | 1.93  | 0.04700 | 11 |         |
| ENSSSCG00000011360 | -1.17 | 0.04763 | 13 | CELSR3  |
| Novel00056         | -2.83 | 0.04775 | 1  | -       |
| ENSSSCG00000048886 | 1.12  | 0.04817 | 2  |         |
| Novel00571         | -1.52 | 0.04831 | 3  | -       |
| ENSSSCG00000036452 | 1.69  | 0.04876 | 9  | LRRC17  |
| Novel00105         | 1.35  | 0.04911 | 10 | -       |
| ENSSSCG00000032115 | 1.11  | 0.04917 | 6  | OSGIN1  |
| ENSSSCG00000041485 | -2.48 | 0.04922 | 6  |         |
| ENSSSCG00000015896 | 1.44  | 0.04938 | 15 | FAP     |
| ENSSSCG00000042529 | -     | 0.04991 | 3  |         |
