# Supplementary material for: Pituitary-Gland-Based Genes Participates in Intrauterine Growth Restriction in Piglets
Source: MDPI journal article supplement (doi:10.3390/genes13112141), 2022-11-17
Supplement: s1 [file s1]

**Supplementary Table S1: The results for RNA integrity.**

| Sample | OD260/280 | RIN Value | 28S/18S | Result |
|--------|-----------|-----------|---------|--------|
| NBW1   | 2.012     | 8.4       | 1.9     | A      |
| NBW2   | 2.097     | 8.6       | 1.8     | A      |
| NBW3   | 2.098     | 8.0       | 1.9     | A      |
| IUGR1  | 2.041     | 8.4       | 2.1     | A      |
| IUGR2  | 2.054     | 7.9       | 1.9     | A      |
| IUGR3  | 2.004     | 8.5       | 1.8     | A      |
