# Supplementary material for: Pituitary-Gland-Based Genes Participates in Intrauterine Growth Restriction in Piglets
Source: MDPI journal article supplement (doi:10.3390/genes13112141), 2022-11-17
Supplement: s1 [file s1]

**Supplementary Table S2: Primers for RT-Qpcr**

| Gene name | Product size(bp) | TM(°C) | Primer sequences (5'to 3')                               |
|-----------|------------------|--------|----------------------------------------------------------|
| ACTB      | 158              | 60     | F:CCTTCTTGGGTATGGAATCCTGT<br>R:CACTGTGTTGGCATAGAGGTCTTAC |
| IGF2      | 212              | 60     | F:ATCGTGGAAGAGTGCTGCTT<br>R:CATAGCGGAAGAACTTGCCC         |
| FOSB      | 162              | 60     | F:GTGAAGTTCAAGTCCTCGGC<br>R:TCACAGAGCAAGAAGGGAGG         |
| EPSTI1    | 188              | 60     | F:AGAGGCTCTTGGTGACTCAC<br>R:GGTTGACTTTCGCCTTGGAG         |
| UCP2      | 213              | 60     | F:GCCAACAGACGTGGTAAAGG<br>R:TGGCATTACGAGCGACATTG         |
| ITGA1     | 154              | 60     | F:TGCCTACAACACCAGAACCA<br>R:GGAGGCTCTTCACTGTCACT         |
| ITGA8     | 179              | 60     | F:CTTTCACATACCTGCGGCTC<br>R:TCAAAGGGTATCTGCCTGCA         |
